# Supplementary material for: Sofosbuvir plus velpatasvir for 8 weeks in patients with acute hepatitis C: The HepNet acute HCV-V study
Source: PubMed Central journal article supplement — JHEP Rep. 2022 Dec 16;5(3):100650. doi: 10.1016/j.jhepr.2022.100650 (PMC9957891; doi:10.1016/j.jhepr.2022.100650), 2022-12-16
Supplement: mmc1.pdf [file mmc1.pdf]

**Supplemental information**

**Sofosbuvir plus velpatasvir for 8 weeks in patients with acute hepatitis C: The HepNet acute HCV-V study**

**Benjamin Maasoumy, Patrick Ingiliz, Christoph D. Spinner, Christiane Cordes, Hans-Jürgen Stellbrink, Julian Schulze zur Wiesch, Stephan M. Schneeweiß, Katja Deterding, Tobias Müller, Julia Kahlhöfer, Petra Dörge, Maria von Karpowitz, Michael P. Manns, Heiner Wedemeyer, Markus Cornberg, and for the HepNet Acute HCV-V Study Group**

# **Sofosbuvir plus velpatasvir for 8 weeks in patients with acute hepatitis C: The HepNet acute HCV-V study**

Benjamin Maasoumy, Patrick Ingiliz, Christoph D Spinner, Christiane Cordes, Hans-Jürgen Stellbrink, Julian Schulze zur Wiesch, Stephan M Schneeweiß, Katja Deterding, Tobias Müller, Julia Kahlhöfer, Petra Dörge, Maria von Karpowitz, Michael P Manns, Heiner Wedemeyer, Markus Cornberg, for the HepNet Acute HCV-V Study Group

## Table of contents

|                |   |
|----------------|---|
| Fig. S1.....   | 2 |
| Table S1 ..... | 3 |
| Table S2.....  | 5 |

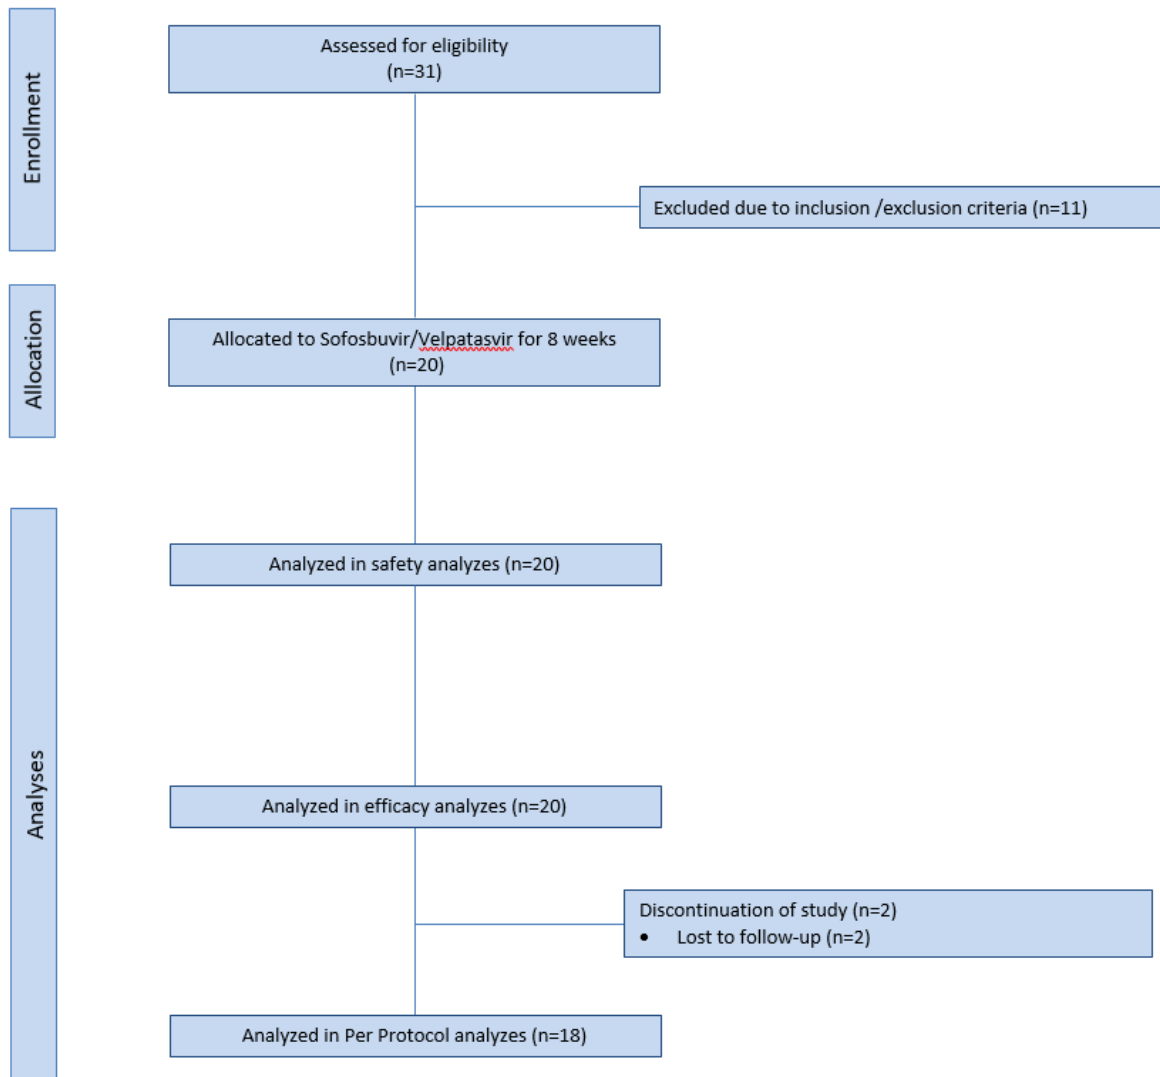

**Fig. S1. Consort chart of patient population**

**Table S1. Detailed inclusion and exclusion criteria**

**Inclusion criteria:**

1. Willing and able to provide written informed consent
2. Male or female, age  $\geq 18$  years
3. HCV RNA  $> 10^3$  IU/mL at screening
4. Confirmation of acute HCV infection documented by either:
  - a. Documented seroconversion to HCV antibody (anti-HCV) positivity within the 4 months preceding screening
  - b. Documented conversion to HCV RNA positivity within the 4 months preceding screening
  - c. or known or suspected exposure to HCV within the 4 months preceding screening with 10 times elevated serum ALT level at screening or 4 months preceding screening without evidence of confounding liver disorders
5. Body mass index (BMI)  $\geq 18$  kg/m<sup>2</sup>
6. Subjects must have the following laboratory parameters at screening:
  - a. INR  $\leq 1.5 \times$  ULN unless subject has known hemophilia or is stable on an anticoagulant regimen affecting INR
  - b. HbA1c  $\leq 10\%$
  - c. Creatinine clearance (CLcr)  $\geq 30$  mL/min, as calculated by the Cockcroft-Gault equation (using actual body weight)
7. A negative serum pregnancy test is required for female subjects (unless surgically sterile or women  $\geq 54$  years of age with cessation for  $24 \geq$  months of previously occurring menses). Complete abstinence from intercourse. Periodic abstinence (e.g., calendar, ovulation, symptothermal, post-ovulation methods) is not permitted.

Or

Consistent and correct use of 1 of the following methods of birth control listed below, in addition to a male partner who correctly uses a condom, from the date of Screening until the end of FU:

  - intrauterine device (IUD) with a failure rate of  $< 1\%$  per year
  - tubal sterilization
  - vasectomy in male partner
  - hormone-containing contraceptive:
    - implants of progestogen-only hormonal contraception associated with inhibition of ovulation
    - injectable progestogen-only hormonal contraception associated with inhibition of ovulation
    - oral contraceptives (either combined or progestogen-only hormonal contraception associated with inhibition of ovulation)
    - contraceptive vaginal ring
    - transdermal contraceptive patch
8. Subject must be able to comply with the dosing instructions for study drug administration and be able to complete the study schedule of assessments.

---

**Exclusion criteria:**

---

1. Subject has been treated with any investigational drug or device within 42 days of the Screening visit or within 5 half-lives for investigational drugs, whichever is longer
  2. Co-Infection with HIV
  3. Clinically-significant illness (other than HCV) or any other major medical disorder that, in the opinion of the investigator, may interfere with subject treatment, assessment or compliance with the protocol.
  4. Solid organ transplantation
  5. Gastrointestinal disorder or post-operative condition that could interfere with the absorption of the study drug (for example, gastric bypass or severe ulcerative colitis).
  6. Clinical signs of hepatic decompensation (i.e., clinical ascites, encephalopathy or variceal hemorrhage).
  7. Difficulty with blood collection and/or poor venous access for the purposes of phlebotomy.
  8. Psychiatric hospitalization, suicide attempt, and/or a period of disability as a result of their psychiatric illness within the last 2 years. Subjects with psychiatric illness that is well-controlled on a stable treatment regimen for at least 12 months prior to screening or has not required medication in the last 12 months may be included.
  9. Significant drug allergy (such as anaphylaxis or hepatotoxicity).
  10. Pregnant or nursing female
  11. Clinically-relevant drug or alcohol abuse that significantly impairs patient compliance. Uncontrolled users of intravenous drugs will not be permitted to enroll in the study.
  12. Clinical relevant(not controlled) liver disease of a non-HCV etiology (e.g., hemochromatosis, autoimmune hepatitis, alcoholic liver disease, Wilson's disease, alpha1 antitrypsin deficiency, cholangitis)
  13. Use of any prohibited concomitant medications within 21 days before the Baseline/Day 1 visit. The use of amiodarone is prohibited from 60 days prior to Day 1 through the end of treatment
  14. Known hypersensitivity to SOF/VEL or formulation excipients.
-

**Table S2. Individual virologic and biochemical kinetics during the study**

| <b>Patient</b>                              |      | <b>1</b> | <b>2</b> | <b>3</b> | <b>4</b> | <b>5</b> | <b>6</b> | <b>7</b> | <b>8</b> | <b>9</b> | <b>10</b> | <b>11</b> | <b>12</b> | <b>13</b> | <b>14</b> | <b>15</b> | <b>16</b> | <b>17</b> | <b>18</b> | <b>19</b> | <b>20</b> |      |    |
|---------------------------------------------|------|----------|----------|----------|----------|----------|----------|----------|----------|----------|-----------|-----------|-----------|-----------|-----------|-----------|-----------|-----------|-----------|-----------|-----------|------|----|
| Sex                                         |      | male     | male     | male     | female   | male     | male     | male     | male     | male     | male      | male      | male      | male      | male      | male      | male      | male      | male      | male      | male      |      |    |
| Age [y]                                     |      | 42       | 28       | 39       | 31       | 42       | 47       | 31       | 59       | 37       | 31        | 35        | 29        | 25        | 38        | 42        | 26        | 48        | 28        | 45        | 29        |      |    |
| Genotype                                    |      | 1a       | 1a       | 1a       | 1b       | 2        | 1a       | 1a       | 3        | 4        | 4         | 1a        | 1a        | 1a        | 1a        | 4         | 1a        | 3         | 3         | 1a        | 1a        |      |    |
| HCV RNA<br>[log <sub>10</sub> IU/ml]        | SCR  | 6,33     | 4,96     | 4,52     | 4,80     | 7,27     | 3,18     | 4,09     | 2,52     | 3,01     | 6,99      | 7,82      | 5,41      | 4,25      | 6,39      | 3,15      | 4,37      | 5,54      | 3,55      | 6,06      | 7,03      |      |    |
|                                             | BL   | 3,89     | 4,85     | 4,59     | 5,46     | 6,81     | 1,38     | 3,84     | ND       | 5,48     | 7,05      | 6,90      | 5,24      | 5,14      | 6,47      | ND        | 3,96      | 5,69      | 3,90      | 4,83      | 7,47      |      |    |
|                                             | W2   | -        | ND        | 1,52      | 1,46      | ND        | ND        | ND        | ND        | ND        | 1,48      | ND        | ND        | 1,73 |    |
|                                             | W4   | ND        | ND        | ND        | -         | ND        | ND   |    |
|                                             | W8   | -        | ND        | ND        | ND        | ND        | ND        | ND        | ND        | ND        | ND        | ND        | ND        | ND   | ND |
|                                             | FU12 | -        | -        | ND        | ND        | ND        | ND        | ND        | ND        | ND        | ND        | ND        | ND        | ND        | ND   | ND |
| Alanine<br>amino-<br>transferase<br>[U/L]   | SCR  | 103      | 292      | 351      | 160      | 262      | 65       | 155      | 45       | 86       | 183       | 126       | 300       | 1045      | 186       | 63        | 729       | 191       | 465       | 779       | 207       |      |    |
|                                             | BL   | 474      | 177      | 316      | 1494     | 121      | 55       | 152      | 38       | 560      | 451       | 1459      | 361       | 604       | 256       | 56        | 222       | 214       | 427       | 241       | 186       |      |    |
|                                             | W2   | -        | 29       | 36       | 86       | 35       | 40       | 42       | 32       | 38       | 53        | 199       | 51        | 34        | 29        | 49        | 38        | 34        | 42        | 91        | 46        |      |    |
|                                             | W4   | 16       | 32       | 31       | 21       | 23       | 39       | 37       | 34       | 26       | 29        | 59        | -         | 23        | 26        | 40        | 31        | 26        | 32        | 90        | 30        |      |    |
|                                             | W8   | -        | 28       | 22       | 21       | 20       | 35       | 44       | -        | 19       | 28        | 54        | 28        | 19        | 24        | 37        | 21        | 21        | 22        | 96        | 26        |      |    |
|                                             | FU12 | -        | -        | 21       | 19       | 19       | 33       | 22       | 31       | 20       | 23        | 22        | 49        | 20        | 25        | 21        | 18        | 18        | 22        | 131       | 29        |      |    |
| Aspartate<br>amino-<br>transferase<br>[U/L] | SCR  | 44       | 78       | 142      | 107      | 116      | 40       | 101      | 32       | 33       | 86        | 75        | 139       | 413       | 104       | 35        | 323       | 95        | 116       | 430       | 97        |      |    |
|                                             | BL   | 196      | 125      | 140      | 1106     | 62       | 38       | 97       | 30       | 349      | 238       | 977       | 154       | 293       | 142       | 35        | 62        | 107       | 199       | 108       | 80        |      |    |
|                                             | W2   | -        | 22       | 30       | 32       | 36       | 36       | 20       | 27       | 28       | 35        | 185       | 37        | 29        | 34        | 32        | 25        | 29        | 31        | 50        | 45        |      |    |
|                                             | W4   | 14       | 26       | 27       | 23       | 26       | 31       | 32       | 29       | 26       | 43        | 39        | -         | 34        | 43        | 38        | 27        | 27        | 27        | 45        | 33        |      |    |
|                                             | W8   | -        | 26       | 25       | 21       | 24       | 32       | 27       | -        | 18       | 34        | 45        | -         | 25        | 37        | 37        | 26        | 25        | 22        | 52        | 29        |      |    |
|                                             | FU12 | -        | -        | 26       | 25       | 23       | 29       | 19       | 24       | 24       | 29        | 24        | 44        | 26        | 31        | 23        | 23        | 25        | 30        | 87        | 30        |      |    |
| Creatinine<br>[μmol/L]                      | SCR  | 90       | 60       | 82       | 97       | 88       | 88       | 80       | 80       | 75       | 92        | 91        | 83        | 80        | 87        | 84        | 71        | 80        | 68        | 68        | 81        |      |    |
|                                             | BL   | 81       | 57       | 66       | 88       | 71       | 88       | 74       | 85       | 76       | 91        | 83        | 88        | 99        | 95        | 93        | 63        | 77        | 73        | 81        | 88        |      |    |
|                                             | W2   | -        | 65       |          | 80       | 88       | 80       | 79       | 80       | 76       | 95        | 76        | 88        | 100       | 87        | 100       | 73        | 80        | 71        | 79        | 103       |      |    |
|                                             | W4   | 79       | 62       | 59       | 97       | 88       | 80       | 75       | 90       | 74       | 96        | 84        | -         | 78        | 116       | 88        | 64        | 79        | 67        | 70        | 88        |      |    |
|                                             | W8   | -        | 68       | 82       | 88       | 71       | 71       | 73       | -        | 72       | 106       | 84        | 82        | 73        | 97        | 89        | 57        | 80        | 71        | 72        | 95        |      |    |
|                                             | FU12 | -        | -        | 79       | 88       | 80       | 80       | 77       | 87       | 82       | 100       | 77        | 100       | 85        | 78        | 78        | 60        | 88        | 75        | 86        | 92        |      |    |
| Gamma-<br>glutamyl-<br>transferase<br>[U/L] | SCR  | 96       | 91       | 360      | 25       | 64       | 78       | 45       | 101      | 39       | 34        | 43        | 154       | 198       | 146       | 91        | 112       | 50        | 159       | 691       | 114       |      |    |
|                                             | BL   | 158      | 93       | 282      | 135      | 71       | 49       | 37       | 75       | 49       | 40        | 354       | 161       | 135       | 165       | 60        | 54        | 49        | 128       | 485       | 92        |      |    |
|                                             | W2   | -        | 49       | 151      | 82       | 47       | 40       | 33       | 53       | 33       | 29        | 195       | 72        | 57        | 74        | 39        | 36        | 28        | 61        | 352       | 51        |      |    |
|                                             | W4   | 39       | 35       | 95       | 40       | 35       | 30       | 18       | 41       | 18       | 19        | 71        | -         | 32        | 40        | 32        | 34        | 17        | 35        | 316       | 25        |      |    |
|                                             | W8   | -        | 26       | 30       | 15       | 31       | 23       | 18       | -        | 12       | 13        | 38        | -         | 18        | 21        | 24        | 18        | 10        | 20        | 334       | 15        |      |    |
|                                             | FU12 | -        | -        | 24       | 12       | 31       | 17       | 15       | 26       | 11       | 9         | 18        | 13        | 12        | 35        | 19        | 18        | 7         | 16        | 388       | 13        |      |    |

|                                            |      |     |     |     |     |     |     |     |     |     |     |     |     |     |     |     |     |     |     |     |     |
|--------------------------------------------|------|-----|-----|-----|-----|-----|-----|-----|-----|-----|-----|-----|-----|-----|-----|-----|-----|-----|-----|-----|-----|
| Hemoglobin<br>[g/L]                        | SCR  | 134 | 135 | 153 | 146 | 145 | 154 | 157 | 158 | 154 | 159 | 141 | 136 | 142 | 142 | 162 | 156 | 145 | 142 | 149 | 153 |
|                                            | BL   | 123 | 140 | 158 | 148 | 137 | 146 | 152 | 156 | 146 | 156 | 137 | 141 | 155 | 136 | 156 | 142 | 146 | 139 | 150 | 161 |
|                                            | W2   | -   | 145 | 149 | 141 | 137 | 150 | 160 | 161 | 150 | 159 | 139 | 143 | 148 | 139 | 160 | 143 | 144 | 143 | 151 | 172 |
|                                            | W4   | 145 | 154 | 159 | 134 | 132 | 149 | 145 | 155 | 151 | 155 | 139 | -   | 156 | 134 | 154 | 152 | 140 | 131 | 152 | 153 |
|                                            | W8   | -   | 155 | 145 | 143 | 153 | 149 | 151 | -   | 146 | 156 | 147 | 156 | 143 | 127 | 161 | 157 | 130 | 132 | 151 | 161 |
|                                            | FU12 | -   | -   | 153 | 139 | 131 | 148 | 154 | 146 | 152 | 156 | 135 | 143 | 143 | 140 | 159 | 147 | 139 | 135 | 148 | 167 |
| Platelet<br>count<br>[10 <sup>3</sup> /μL] | SCR  | 219 | 261 | 347 | 199 | 134 | 234 | 220 | 283 | 176 | 259 | 307 | 345 | 213 | 298 | 222 | 228 | 245 | 238 | 110 | 184 |
|                                            | BL   | 215 | 212 | 362 | 177 | 167 | 206 | 168 | 329 | 140 | 237 | 208 | 329 | 244 | 321 | 217 | 236 | 246 | 232 | 203 | 180 |
|                                            | W2   | -   | 238 | 352 | 246 | 228 | 229 | 206 | 280 | 192 | 234 | 336 | 331 | 243 | 300 | 221 | 296 | 271 | 236 | 175 | 206 |
|                                            | W4   | 344 | 229 | 406 | 174 | 131 | 237 | 189 | 300 | 178 | 204 | 294 | -   | 249 | 286 | 219 | 256 | 239 | 230 | 175 | 155 |
|                                            | W8   | -   | 226 | 402 | 198 | 154 | 237 | 191 | -   | 183 | 231 | 265 | 293 | 225 | 303 | 214 | 284 | 298 | 236 | 156 | 160 |
|                                            | FU12 | -   | -   | 374 | 181 | 135 | 228 | 182 | 297 | 161 | 234 | 339 | 233 | 258 | 342 | 213 | 270 | 233 | 252 | 203 | 155 |
| Bilirubin<br>[μmol/L]                      | SCR  | 54  | 80  | 14  | 10  | 5   | 10  | 14  | 10  | 9   | 7   | 10  | 10  | 23  | 5   | 10  | 35  | 11  | 10  | 34  | 17  |
|                                            | BL   | 38  | 23  | 17  | 10  | 5   | 10  | 12  | 7   | 12  | 7   | 17  | 12  | 28  | 6   | 12  | 13  | 8   | 8   | 11  | 26  |
|                                            | W2   | -   | 14  | 10  | 9   | 5   | 9   | 21  | 6   | 5   | 9   | 10  | 5   | 29  | 6   | 9   | 23  | 6   | 12  | 8   | 24  |
|                                            | W4   | 10  | 10  | 14  | 10  | 7   | 10  | -   | 6   | 7   | 12  | 7   | -   | 27  | 12  | 13  | 13  | 10  | 10  | 9   | 9   |
|                                            | W8   | -   | 4   | 12  | 9   | 14  | 15  | 14  | -   | 3   | 10  | 15  | -   | 15  | 10  | 12  | 15  | 8   | 8   | 5   | 10  |
|                                            | FU12 | -   | -   | 9   | 17  | 3   | 12  | 10  | 6   | 10  | 9   | 3   | 22  | 13  | 8   | 12  | 12  | 7   | 9   | 12  | 9   |

HCV, hepatitis C virus; RNA, ribonucleid acid; SCR, screening; BL, baseline; W2, week 2; W4, week 4; W8, week 8; FU12, follow up week 12
