# Supplementary material for: Sofosbuvir plus velpatasvir for 8 weeks in patients with acute hepatitis C: The HepNet acute HCV-V study
Source: PubMed Central journal article supplement — JHEP Rep. 2022 Dec 16;5(3):100650. doi: 10.1016/j.jhepr.2022.100650 (PMC9957891; doi:10.1016/j.jhepr.2022.100650), 2022-12-16
Supplement: mmc2.pdf [file mmc2.pdf]

## Journal of Hepatology

### CTAT methods

Tables for a “Complete, Transparent, Accurate and Timely account” (CTAT) are now mandatory for all revised submissions. The aim is to enhance the reproducibility of methods.

- Only include the parts relevant to your study
- Refer to the CTAT in the main text as ‘Supplementary CTAT Table’
- Do not add subheadings
- Add as many rows as needed to include all information
- Only include one item per row

If the CTAT form is not relevant to your study, please outline the reasons why:

|  |
|--|
|  |
|--|

#### 1.1 Antibodies

| Name | Citation | Supplier | Cat no. | Clone no. |
|------|----------|----------|---------|-----------|
| NA   |          |          |         |           |

#### 1.2 Cell lines

| Name | Citation | Supplier | Cat no. | Passage no. | Authentication test method |
|------|----------|----------|---------|-------------|----------------------------|
| NA   |          |          |         |             |                            |

#### 1.3 Organisms

| Name | Citation | Supplier | Strain | Sex | Age | Overall n number |
|------|----------|----------|--------|-----|-----|------------------|
| NA   |          |          |        |     |     |                  |

#### 1.4 Sequence based reagents

| Name                            | Sequence | Supplier     |
|---------------------------------|----------|--------------|
| Hologic Aptima® HCV Quant Assay |          | Hologic GmbH |

#### 1.5 Biological samples

| Description | Source | Identifier |
|-------------|--------|------------|
| NA          |        |            |

#### 1.6 Deposited data

| Name of repository | Identifier | Link |
|--------------------|------------|------|
| NA                 |            |      |

## 1.7 Software

| Software name | Manufacturer       | Version |
|---------------|--------------------|---------|
| SAS           | SAS Institute GmbH | 9.4     |

## 1.8 Other (e.g. drugs, proteins, vectors etc.)

|                        |          |                |
|------------------------|----------|----------------|
| Sofosbuvir/velpatasvir | Epclusa® | Gilead Science |
|                        |          |                |

## 1.9 Please provide the details of the corresponding methods author for the manuscript:

[Cornberg.markus@mh-hannover.de](mailto:Cornberg.markus@mh-hannover.de)

## 2.0 Please confirm for randomised controlled trials all versions of the clinical protocol are included in the submission. These will be published online as supplementary information.

NA
